# Supplementary material
Source: publisher site journal article supplement (https://www.dovepress.com/article/367510)
Supplement: Supplementary file 1 [file get_supplementary_file.php]

**Supplementary material: Appendix 1**

**Micro Titter Plate Assay Procedures Used for Biofilm Detection of Bacterial Isolates**

Micro titter plate assay for biofilm involves the analysis of bacterial adhesion and biofilm formation on sterile polystyrene wells by measuring the optical density at wave length of 570 nm after 24 hrs incubation.

**Procedures:**

- - 1. Bacterial Isolates from cultures will be used to prepare (0.5 McFarland turbidity ) standardized bacterial suspension in sterile normal saline adjusted to a 0.5 McFarland turbidity standard
    2. Tryptic soy broth (TSB)/ brain heart infusion(BHI) supplemented with 1% glucose (1:100 dilution with fresh TSB) will be prepared
    3. Bacterial suspension adjusted to a 0.5 McFarland turbidity standard will be diluted to TSB supplemented with 1% glucose (1:100 with fresh TSB)

I.e. the wells of the micro titer plate will be filled with 180 µL of TSB supplemented with 1% glucose. Thereafter, a 20 µL quantity of previously prepared bacterial suspensions is added to each well with final volume of 200 µL (90wells, for 30 strains). This will be performed in triplicate for each isolate. For negative control only 200µL will be added to the microliter well (6 wells for negative control)

- - 1. Cover each plate with the lid supplied by the manufacturer or alternatively with an adhesive foil lid, which increases biofilm formation by creating an environment with reduced oxygen tension
    2. Transfers inoculated assay plates to an incubator and incubate at 37°C for 16-24 hr. without shaking (static culture).
    3. Following incubation, remove lids from assay plates. And the content of each well will be aspirated, and each well will be washed 3-4 times with sterile distilled water/ PBS ph. of 7.4 to remove planktonic bacteria from each microtiter, while taking care to preserve the structure of the biofilm located on the bottom of each assay well

1. The remaining attached bacteria will be fixed with 200 µL of methanol per well for 20 min
2. Following fixation with 200 µL of methanol for 20 min, the microtiter plates should be emptied by simple flicking, and left to air dry overnight in an inverted position at room temperature
3. Then 250 µl of 0.1% crystal violet/0.1% Safranin solution will be added to each well, and kept for 10-15 min at room temperature.
4. Each micro-titer well will be washed with sterile distilled water/ PBS ph. of 7.4 to remove the crystal violet solution.
5. Plates will be allowed to air-dry and 250 µl of 95% ethanol per well will be added to each stained well to solubilize the crystal violet dye by covering plates with the lid (to minimize evaporation) and incubating for 15 min at room temperature without shaking.
6. Transfer the homogenized/ eluted dye to a new microtiter plate, and measure the optical density (OD) of each well at 570 by using automatic ELISA reader and OD values will be considered as index of bacteria adhering to surface and forming biofilm.
7. Finally the cut‑off optical density (ODc) will be calculated and defined as three standard deviations above the mean OD of the negative control or un-inoculated (blank) wells, i.e., TSB broth. ( i.e. ODc = average OD of negative control +(3×SD of negative control )
8. Based on the OD produced by bacterial films at a wavelength of 570 nm, isolates will be classified as: none, weak, moderate or strong biofilm producers.

- OD < ODc = biofilm non-producer
- OD > ODc, but < 2 x ODc = weak biofilm producer
- OD > 2 x ODc but < 4 x ODc = moderate biofilm producer
- OD > 4 x ODc = strong biofilm producer NB: All tests will be carried out in triplicate and the average results will be taken and the amount of Crystal violet bound in each well is proportional to the amount of biofilm production.

**Note:**TSB contains 0.25% glucose; add 1.88 ml of filter sterilized 40% glucose to 100 ml TSB to achieve a final concentration of 1%. Analysis of the sensitivity and specificity of the TCP method using PCR as a parameter showed that the use of dry plates and of the 540-nm filter provided the best sensitivity (97.6%) and specificity (94.4%).
